# Supplementary material for: Salivary Biomarkers for Detection of Oral Squamous Cell Carcinoma in a Taiwanese Population
Source: Oxford University Press journal article supplement (doi:10.1158/1078-0432.ccr-15-1761), 2016-02-05
Supplement: 10780432ccr151761-sup-152941_2_supp_3301961_p0nbmj.docx [file 10780432ccr151761-sup-152941_2_supp_3301961_p0nbmj.docx]

| **Supplementary table 3 – qPCR and ELISA results for each sample before normalization** | | | | | | | | | | | | | | |
| --- | --- | --- | --- | --- | --- | --- | --- | --- | --- | --- | --- | --- | --- | --- |
| **Subject ID** | **Study group** | **Target salivary RNAs** | | | | | | | **Internal salivary RNA controls** | | | **Target salivary proteins** | | **Internal salivary protein control** |
| **IL-1β** | **IL-8** | **SAT1** | **OAZ1** | **DUSP1** | **S100P** | **H3F3A** | **GAPDH** | **ACTB** | **RPS9** | **IL-8**  **(Picogram)** | **IL-1β**  **(Picogram)** | **Total protein**  **(Milligram)** |
| Y002 | OSCC | 24.6 | 22.2 | 27.3 | 22.7 | 40 | 37.2 | 14.7 | 15.3 | 20.6 | 20.6 | 446.645 | 112.071 | 1.103 |
| Y005 | OSCC | 21.1 | 20.1 | 21.1 | 18.4 | 24.2 | 26.1 | 15 | 12.6 | 16.9 | 17.6 | 259.254 | 12.356 | 1.896 |
| Y016 | OSCC | 40 | 38.4 | 31.7 | 25.1 | 28.9 | 40 | 20.4 | 16 | 21.1 | 23.3 | 239.085 | 176.13 | 1.827 |
| Y017 | OSCC | 33.1 | 33.4 | 29.7 | 22.9 | 40 | 35.9 | 20.6 | 16.6 | 22.4 | 18.7 | 122.733 | 88.221 | 1.15 |
| Y025 | OSCC | 23.8 | 22.1 | 25.9 | 24.3 | 37.1 | 38.3 | 23.3 | 17.8 | 22.6 | 22.5 | 234.676 | 72.475 | 1.093 |
| Y034 | OSCC | 30.6 | 31.1 | 32.2 | 24.2 | 37.4 | 34 | 20.8 | 19.9 | 27.7 | 25.3 | 269.241 | 131.549 | 0.353 |
| Y040 | OSCC | 29.7 | 33.8 | 31.8 | 24.1 | 40 | 37.2 | 18.9 | 14.6 | 20.6 | 19.3 | 160.018 | 63.99 | 1.137 |
| Y044 | OSCC | 30.5 | 29.1 | 28.5 | 24.4 | 41 | 41 | 21.9 | 19.2 | 24.6 | 24.7 | 240.825 | 112.585 | 0.536 |
| Y049 | OSCC | 27.5 | 25.9 | 29.2 | 22.7 | 38 | 36.1 | 20.1 | 19.2 | 24.2 | 24 | 813.845 | 269.245 | 2.064 |
| Y055 | OSCC | 28.2 | 27.9 | 30.2 | 18.9 | 28.4 | 37.1 | 14.9 | 14.8 | 17.5 | 17.6 | 268.658 | 64.543 | 1.787 |
| Y073 | OSCC | 25.1 | 26.9 | 25.4 | 20 | 41 | 41 | 15.5 | 15.6 | 19.4 | 19.1 | 770.466 | 169.267 | 1.888 |
| Y077 | OSCC | 25.8 | 22.2 | 25.7 | 15.9 | 39 | 36.7 | 15.2 | 10.7 | 17.2 | 16.3 | 208.57 | 81.346 | 1.046 |
| Y078 | OSCC | 27 | 25.1 | 24.8 | 20 | 26.2 | 26.4 | 18.3 | 13.5 | 21.4 | 19.9 | 164.859 | 18.884 | 0.959 |
| Y079 | OSCC | 35.7 | 31.7 | 33.7 | 29 | 40 | 35.7 | 25.8 | 24.3 | 29.2 | 24.6 | 288.722 | 191.728 | 0.759 |
| Y084 | OSCC | 28.4 | 26.9 | 29.9 | 23.5 | 32.9 | 37.9 | 22.7 | 19.6 | 24.1 | 24.2 | 656.394 | 419.488 | 1.931 |
| Y089 | OSCC | 29.3 | 30.9 | 29 | 32.1 | 41 | 40 | 30.3 | 18.3 | 23.7 | 22.6 | 171.791 | 22.805 | 0.483 |
| Y098 | OSCC | 31.8 | 24.7 | 28.2 | 20.8 | 22.6 | 25.7 | 18.1 | 16.7 | 22.6 | 21.5 | 129.87 | 70.706 | 0.563 |
| Y121 | OSCC | 32.9 | 29.9 | 30.8 | 21.6 | 41 | 41 | 19.7 | 16 | 21.6 | 21.9 | 96.68 | 18.294 | 0.459 |
| Y123 | OSCC | 27.8 | 26 | 24.8 | 27 | 41 | 41 | 22.8 | 14.8 | 21.2 | 21.6 | 367.788 | 75.928 | 2.656 |
| Y124 | OSCC | 25.1 | 25.2 | 24.5 | 22.7 | 40 | 30.1 | 15 | 15.6 | 19.3 | 16.7 | 255.997 | 45.533 | 0.764 |
| Y133 | OSCC | 27.8 | 31.8 | 27 | 31.7 | 36.8 | 34.5 | 33.3 | 28.1 | 31.5 | 33 | 344.633 | 119.821 | 2.045 |
| Y137 | OSCC | 36.9 | 36.2 | 34.3 | 26.8 | 41 | 36.5 | 28.3 | 24.3 | 32.7 | 32.8 | 181.528 | 50.682 | 0.79 |
| Y146 | OSCC | 29.4 | 29 | 29.9 | 32.3 | 41 | 40 | 29.2 | 20.4 | 26.1 | 25.9 | 93.609 | 61.474 | 0.642 |
| Y165 | OSCC | 27.7 | 26 | 29.6 | 25.7 | 41 | 41 | 23.7 | 23.7 | 28.2 | 28.8 | 29.693 | 10.825 | 0.139 |
| Y177 | OSCC | 29.7 | 28.9 | 31.8 | 23.8 | 41 | 35 | 25.6 | 20.7 | 28.6 | 29.7 | 1048.72 | 419.488 | 1.888 |
| Y181 | OSCC | 26.9 | 24.9 | 27.3 | 17.9 | 29 | 33.9 | 15.5 | 13.1 | 16.9 | 17.7 | 212.442 | 48.414 | 1.305 |
| Y188 | OSCC | 24 | 24 | 24.4 | 21.4 | 28.9 | 26.3 | 20.1 | 16.9 | 21 | 21.6 | 118.537 | 57.268 | 1.033 |
| Y199 | OSCC | 33.7 | 28.6 | 30.5 | 23.7 | 29.2 | 41 | 18.6 | 17.2 | 22.4 | 20.7 | 1048.72 | 203.806 | 2.297 |
| Y206 | OSCC | 29.3 | 27.8 | 26.5 | 18.8 | 41 | 33 | 18.3 | 14.5 | 21.4 | 17.5 | 751.748 | 419.488 | 2.936 |
| Y234 | OSCC | 41 | 36.2 | 36.9 | 23.3 | 40 | 37.4 | 19 | 18.2 | 28.5 | 22.8 | 190.623 | 115.018 | 1.974 |
| Y235 | OSCC | 26.5 | 28.6 | 26.8 | 25.9 | 29.6 | 30.4 | 17.7 | 16.3 | 20.7 | 20.5 | 223.364 | 21.195 | 1.886 |
| Y246 | OSCC | 28 | 26.7 | 25.2 | 18.9 | 29.8 | 34 | 16.4 | 14.3 | 19.9 | 20.9 | 109.705 | 26.494 | 1.065 |
| Y247 | OSCC | 32.4 | 26 | 29.5 | 22.3 | 29.5 | 40 | 18.8 | 16 | 21.1 | 22 | 359.065 | 268.434 | 2.065 |
| Y254 | OSCC | 31.5 | 30 | 30.7 | 28.3 | 28.8 | 38.5 | 25 | 20.5 | 24.8 | 25.9 | 648.68 | 338.104 | 1.084 |
| Y262 | OSCC | 27.7 | 27.6 | 29.6 | 19.4 | 26.9 | 29.5 | 12.2 | 9.8 | 13.5 | 15.3 | 242.525 | 23.658 | 1.633 |
| Y265 | OSCC | 25.1 | 24.5 | 24 | 24.8 | 41 | 32.3 | 20.5 | 20.9 | 23.8 | 22.4 | 860.776 | 266.284 | 1.623 |
| Y291 | OSCC | 37.6 | 28.1 | 28.1 | 21.8 | 28 | 36.2 | 19.5 | 15.9 | 20.6 | 20.6 | 165.063 | 33.172 | 0.666 |
| Y298 | OSCC | 31.7 | 26.6 | 25.7 | 21 | 41 | 37.7 | 19.2 | 16.2 | 24.3 | 21.4 | 185.127 | 70.961 | 1.356 |
| Y300 | OSCC | 28 | 25.2 | 29 | 28.8 | 29.2 | 36.2 | 24.6 | 23.3 | 26 | 23 | 63.922 | 29.185 | 0.532 |
| Y302 | OSCC | 26.5 | 23.6 | 23.3 | 20.3 | 32.4 | 29.4 | 16.9 | 14.7 | 19.8 | 20.9 | 216.408 | 11.869 | 1.463 |
| Y304 | OSCC | 24.8 | 21.4 | 26.5 | 27.7 | 41 | 36.4 | 25.7 | 21.2 | 24.8 | 25.9 | 48.91 | 25.925 | 0.065 |
| Y311 | OSCC | 28.9 | 23.8 | 28.6 | 26.7 | 34.3 | 34.6 | 24 | 18 | 22.1 | 24.5 | 80.108 | 6.942 | 0.755 |
| Y321 | OSCC | 27.5 | 24.3 | 26.3 | 27.5 | 36.9 | 36.1 | 25.5 | 16.7 | 23.4 | 21.5 | 4.789 | 0 | 1.299 |
| Y324 | OSCC | 27.8 | 29.3 | 26.8 | 27.4 | 41 | 34.6 | 21.3 | 18.8 | 25.3 | 24.8 | 233.635 | 116.381 | 1.781 |
| Y325 | OSCC | 28.3 | 25 | 27.8 | 23.6 | 41 | 34.1 | 23.6 | 18.2 | 25.4 | 24.7 | 1048.72 | 419.488 | 1.753 |
| Y326 | OSCC | 26.9 | 26.5 | 27.2 | 29.8 | 27.9 | 39.4 | 24 | 21.8 | 28.4 | 29 | 58.573 | 15.87 | 0.415 |
| Y327 | OSCC | 24.9 | 23.5 | 25.7 | 25 | 26.5 | 34.8 | 16.8 | 15.4 | 20.2 | 21.3 | 154.803 | 29.121 | 0.794 |
| Y345 | OSCC | 24.4 | 26.9 | 28.8 | 22.3 | 27 | 29.4 | 20.1 | 17.6 | 22 | 22 | 94.944 | 70.564 | 0.857 |
| Y451 | OSCC | 30.3 | 26.8 | 28.8 | 20.6 | 31.5 | 32.6 | 19.1 | 14.8 | 18.9 | 18.1 | 280.685 | 87.631 | 1.809 |
| Y467 | OSCC | 22.1 | 24.1 | 23.1 | 29.7 | 41 | 40 | 24.1 | 22.8 | 26.3 | 27.1 | 79.936 | 7.029 | 0.551 |
| Y470 | OSCC | 24.6 | 26.1 | 24.2 | 24.7 | 28.6 | 32.3 | 21.4 | 18.5 | 27.1 | 27.7 | 192.992 | 19.755 | 1.101 |
| Y480 | OSCC | 40 | 36.4 | 35.4 | 25.7 | 36 | 41 | 19.3 | 18.6 | 27.2 | 23.1 | 140.641 | 41.795 | 0.958 |
| Y483 | OSCC | 22.9 | 23.9 | 26.7 | 23.4 | 30 | 26.1 | 18.8 | 15.5 | 21.2 | 19.8 | 229.444 | 46.802 | 1.056 |
| Y495 | OSCC | 26.1 | 29.7 | 25.8 | 20.4 | 41 | 41 | 17.3 | 15.1 | 21.6 | 21.5 | 161.448 | 124.267 | 0.936 |
| Y504 | OSCC | 41 | 31.8 | 32.3 | 25.9 | 41 | 38.3 | 24.4 | 20.9 | 27.1 | 27.8 | 294.082 | 77.785 | 0.892 |
| Y505 | OSCC | 25.3 | 24.4 | 23.9 | 20.3 | 28.1 | 40 | 16.9 | 13.6 | 18.9 | 19 | 93.369 | 6.778 | 1.213 |
| Y507 | OSCC | 26.7 | 25.4 | 25.5 | 22.8 | 35.3 | 30.4 | 18.9 | 17.2 | 22.4 | 24.9 | 226.313 | 31.095 | 0.388 |
| Y524 | OSCC | 25.7 | 26.6 | 24.7 | 21.9 | 38.5 | 37.2 | 21 | 17.9 | 23.6 | 22.2 | 0 | 53.387 | 0.623 |
| Y530 | OSCC | 25.9 | 25 | 24.2 | 25.5 | 27.9 | 28.6 | 21.6 | 19.9 | 25.8 | 28.3 | 149.898 | 19.265 | 0.626 |
| Y538 | OSCC | 24.5 | 25.5 | 25.1 | 18 | 40 | 34.6 | 15.7 | 14.9 | 19.8 | 18.6 | 190.567 | 49.348 | 1.792 |
| Y007 | Control | 27.1 | 24.3 | 26.2 | 20.5 | 25 | 29.5 | 16.2 | 14.9 | 21.6 | 21 | 96.641 | 50.71 | 1.466 |
| Y008 | Control | 28.9 | 32.5 | 28.9 | 29.8 | 41 | 41 | 33 | 22.6 | 28.1 | 26.3 | 36.041 | 35.64 | 0.394 |
| Y010 | Control | 32.6 | 37.3 | 30.3 | 22.2 | 38.4 | 36.3 | 17.8 | 18 | 24.7 | 21.9 | 127.469 | 154.804 | 0.802 |
| Y014 | Control | 30.9 | 29.4 | 30.1 | 18.7 | 28.4 | 35.8 | 15.1 | 13.7 | 20.1 | 18.9 | 51.093 | 7.702 | 1.195 |
| Y020 | Control | 31.7 | 29.8 | 29.3 | 21.8 | 31.2 | 35.5 | 20.2 | 17.7 | 27 | 25.7 | 147.125 | 48.778 | 0.64 |
| Y023 | Control | 32.4 | 34.2 | 35.1 | 31 | 36 | 38.1 | 27.8 | 26.9 | 32.7 | 30.6 | 73.43 | 23.923 | 1.619 |
| Y031 | Control | 22.2 | 20.6 | 21.3 | 19.7 | 23.4 | 31.3 | 15.7 | 13 | 17.5 | 18.8 | 113.141 | 22.697 | 0.656 |
| Y041 | Control | 28.6 | 28.9 | 28.1 | 18.7 | 40 | 38.2 | 15.8 | 16.1 | 20.4 | 21.6 | 152.882 | 94.615 | 1.207 |
| Y046 | Control | 21.4 | 21.9 | 22.1 | 23.7 | 24.5 | 26.5 | 20.6 | 14.4 | 19.8 | 19.7 | 54.882 | 61.186 | 0.707 |
| Y053 | Control | 28.6 | 27.6 | 28.3 | 22.5 | 40 | 36 | 20.1 | 20 | 24.6 | 24.4 | 78.728 | 53.871 | 0.789 |
| Y054 | Control | 27.3 | 30.4 | 28.5 | 17.8 | 30.5 | 37.8 | 13.8 | 13.9 | 18.5 | 17.5 | 183.147 | 38.082 | 0.79 |
| Y067 | Control | 28.4 | 27.7 | 36.2 | 20.9 | 40 | 38.9 | 16.7 | 16.4 | 21 | 20.8 | 64.393 | 48.759 | 1.101 |
| Y068 | Control | 23.7 | 24.5 | 28 | 30 | 28.3 | 29.4 | 28.2 | 18.9 | 23.3 | 23.4 | 69.985 | 29.384 | 1.491 |
| Y081 | Control | 23.1 | 25.1 | 23.6 | 23.5 | 28.3 | 33.9 | 19 | 19.4 | 21.8 | 20.1 | 137.603 | 64.752 | 1.365 |
| Y082 | Control | 24.7 | 24.5 | 27.8 | 29.7 | 41 | 41 | 30 | 19.5 | 24.2 | 24.7 | 151.19 | 14.046 | 0.767 |
| Y083 | Control | 32.7 | 24.8 | 30.6 | 24.1 | 29.2 | 35.5 | 21.8 | 18.5 | 25 | 24.9 | 67.024 | 18.342 | 0.751 |
| Y088 | Control | 24.1 | 26.6 | 26.9 | 20.1 | 41 | 40 | 16.5 | 17.2 | 22.6 | 20.9 | 94.211 | 46.479 | 1.096 |
| Y096 | Control | 21.3 | 22.6 | 21.7 | 20.1 | 26.2 | 37 | 18.5 | 11.7 | 16.8 | 17.4 | 654.887 | 105.025 | 2.612 |
| Y099 | Control | 29.2 | 26.9 | 27.9 | 27.7 | 28 | 33.6 | 20.6 | 13.3 | 19.2 | 20.3 | 226.936 | 114.387 | 0.906 |
| Y106 | Control | 27.3 | 23.8 | 27.3 | 23.9 | 41 | 30.5 | 19.7 | 17.4 | 24.1 | 24.1 | 210.362 | 16.611 | 1.374 |
| Y109 | Control | 27.1 | 25.9 | 25.5 | 25.2 | 30.7 | 38 | 23.2 | 21.1 | 26.5 | 28.3 | 161.646 | 69.427 | 1.063 |
| Y128 | Control | 38.1 | 33.9 | 30.8 | 31.6 | 33.8 | 37.1 | 30.5 | 24.3 | 30.7 | 31.9 | 254.19 | 67.435 | 1.45 |
| Y132 | Control | 27.2 | 26.9 | 28.2 | 23.1 | 36.8 | 30.9 | 18.1 | 16.3 | 23.7 | 22 | 383.897 | 87.435 | 0.583 |
| Y136 | Control | 35.7 | 29.5 | 31.6 | 33.3 | 41 | 36.1 | 32.2 | 18.5 | 26.5 | 27.4 | 233.377 | 134.614 | 1.479 |
| Y139 | Control | 20.8 | 20.4 | 22.5 | 20.4 | 29.2 | 27.6 | 15.6 | 14.2 | 18 | 18 | 48.265 | 13.539 | 1.041 |
| Y140 | Control | 34.5 | 30.1 | 30.2 | 27.9 | 40 | 36.6 | 32.3 | 24.6 | 31.2 | 29.1 | 81.545 | 29.458 | 0.786 |
| Y145 | Control | 25.2 | 23.5 | 27.7 | 23.8 | 40 | 36.4 | 20.9 | 15.9 | 21.5 | 21.6 | 56.101 | 9.776 | 0.744 |
| Y150 | Control | 22.7 | 22.2 | 26.3 | 19.4 | 35.8 | 29.2 | 14.9 | 14.7 | 19.9 | 20.4 | 176.748 | 87.137 | 0.836 |
| Y153 | Control | 23.6 | 23.5 | 25.9 | 21.8 | 40 | 37.2 | 17 | 19.8 | 24.5 | 22.7 | 177.903 | 161.993 | 1.946 |
| Y158 | Control | 24.2 | 26 | 26.6 | 23.1 | 26.9 | 27.7 | 18.6 | 16.9 | 19.9 | 21.5 | 77.945 | 74.409 | 1.234 |
| Y159 | Control | 26.3 | 26.3 | 27.6 | 27.3 | 29.5 | 38 | 21.4 | 18.7 | 23.2 | 24 | 36.651 | 9.25 | 0.87 |
| Y164 | Control | 24.3 | 23.5 | 26.9 | 22.7 | 27.5 | 26.7 | 18.9 | 17.2 | 20.1 | 22.5 | 70.596 | 8.74 | 0.491 |
| Y166 | Control | 30.6 | 33.7 | 28.2 | 25.9 | 41 | 30.3 | 25.2 | 21.9 | 30.5 | 26.7 | 10.869 | 26.732 | 0.199 |
| Y169 | Control | 41 | 33.7 | 37.3 | 32.5 | 41 | 38.9 | 30.9 | 23.4 | 27.5 | 27.7 | 59.566 | 11.319 | 1.205 |
| Y175 | Control | 28.2 | 26.6 | 24.6 | 23 | 28.1 | 32.1 | 22.6 | 19 | 24.4 | 22.5 | 37.621 | 17.651 | 0.639 |
| Y182 | Control | 30.6 | 30.2 | 29.7 | 28.8 | 35.4 | 34 | 28.1 | 21.4 | 29.7 | 30.2 | 271.788 | 129.16 | 1.611 |
| Y189 | Control | 24.1 | 24.6 | 24.1 | 24.1 | 28 | 34.9 | 22 | 17.2 | 21.8 | 23.4 | 0 | 5.327 | 2.415 |
| Y196 | Control | 29.6 | 26.1 | 29 | 18.6 | 37.3 | 35.3 | 15.3 | 12.6 | 16.5 | 17.3 | 339.946 | 12.011 | 0.474 |
| Y238 | Control | 30.9 | 31.3 | 30.6 | 23.4 | 29.1 | 40 | 18.8 | 17.6 | 23.1 | 24.5 | 107.813 | 13.991 | 1.275 |
| Y239 | Control | 28.9 | 30.5 | 27.3 | 22.8 | 29.5 | 34.6 | 21.7 | 19.6 | 26 | 22.9 | 105.815 | 87.619 | 1.396 |
| Y240 | Control | 36.6 | 41 | 38.3 | 23 | 41 | 41 | 23.6 | 22.1 | 29.7 | 30 | 90.669 | 84.306 | 1.248 |
| Y244 | Control | 27.6 | 25.4 | 26.6 | 23.2 | 26.8 | 27.9 | 21.5 | 16.5 | 23.8 | 25.5 | 220.111 | 12.38 | 2.249 |
| Y263 | Control | 32.6 | 30.3 | 30.6 | 27.7 | 41 | 41 | 24.6 | 18.3 | 24.5 | 25.8 | 325.94 | 131.144 | 1.4 |
| Y264 | Control | 26.9 | 27 | 26.3 | 22.7 | 24.7 | 30.3 | 20.6 | 18.2 | 23.9 | 25.4 | 220.745 | 132.235 | 1.676 |
| Y268 | Control | 26.3 | 26.2 | 23.3 | 27.7 | 25.2 | 33.6 | 22.9 | 17.1 | 22.3 | 24 | 93.819 | 9.926 | 0.588 |
| Y281 | Control | 26.2 | 24.8 | 26.4 | 20 | 40 | 35.8 | 16.9 | 16 | 21.9 | 18.9 | 34.679 | 25.09 | 0.495 |
| Y287 | Control | 22.8 | 24.5 | 22.4 | 26.1 | 27.5 | 30.1 | 18.3 | 17.6 | 21.2 | 20.7 | 108.845 | 15.413 | 1.12 |
| Y288 | Control | 25.8 | 24.5 | 28.3 | 23.9 | 26.1 | 29.1 | 17.4 | 15.2 | 21.5 | 23.5 | 45.683 | 0 | 0.572 |
| Y289 | Control | 24.3 | 24.7 | 24 | 21 | 28.3 | 36.4 | 16.4 | 11.8 | 17.4 | 15.2 | 108.723 | 10.355 | 1.113 |
| Y296 | Control | 23.8 | 27.1 | 23.3 | 21.2 | 24.8 | 27.4 | 20 | 14.9 | 19.4 | 20.1 | 0 | 19.11 | 0.936 |
| Y297 | Control | 27.9 | 29.3 | 30.6 | 26.1 | 29.9 | 30.2 | 20 | 19.3 | 22 | 23.9 | 33.319 | 18.466 | 0.754 |
| Y299 | Control | 25.1 | 24.8 | 24.2 | 20.8 | 27.5 | 30.5 | 16.9 | 15 | 19.9 | 20.4 | 0 | 14.982 | 0.987 |
| Y301 | Control | 24.9 | 25.8 | 27.5 | 20.7 | 37.6 | 37 | 18.8 | 17 | 22.1 | 20.5 | 132.753 | 77.127 | 1.937 |
| Y312 | Control | 23 | 27.2 | 25.8 | 32.4 | 27 | 40 | 21.9 | 16 | 20.4 | 20.1 | 120.837 | 41.129 | 0.475 |
| Y314 | Control | 28.7 | 28.7 | 29.2 | 21.7 | 28.1 | 28.8 | 19.1 | 18.4 | 27.2 | 27.9 | 102.785 | 26.092 | 0.818 |
| Y315 | Control | 24.2 | 28.1 | 23.2 | 22.1 | 25.5 | 25.8 | 21.1 | 13.1 | 23.2 | 21 | 37.598 | 14.994 | 0.168 |
| Y333 | Control | 24.4 | 22.8 | 21.2 | 21.8 | 23.8 | 25.5 | 18.2 | 16 | 20.5 | 21 | 221.281 | 45.385 | 1.762 |
| Y475 | Control | 23.8 | 22.9 | 25.1 | 29.4 | 27.9 | 37.8 | 21.6 | 17.9 | 21.5 | 21.8 | 129.555 | 30.648 | 0.309 |
| Y482 | Control | 31.1 | 27.6 | 29.7 | 25.1 | 37.2 | 37.8 | 23.8 | 19.4 | 27.8 | 26.1 | 0 | 21.423 | 1.341 |
| Y517 | Control | 28.1 | 27.1 | 27.9 | 27.5 | 29.7 | 38.1 | 21.2 | 20.1 | 26.7 | 26.7 | 156.578 | 46.911 | 1.119 |
| Y009 | PMOD | 24.1 | 23.8 | 26.8 | 25 | 26.9 | 36.8 | 20 | 18.6 | 24.2 | 26.2 | 58.79 | 22.275 | 0.488 |
| Y011 | PMOD | 23.7 | 22.2 | 24.4 | 20.4 | 24.6 | 35.4 | 17.6 | 16.7 | 20.2 | 20.6 | 58.005 | 40.38 | 0.322 |
| Y012 | PMOD | 29.5 | 31.3 | 28.5 | 23.3 | 35.7 | 38.4 | 21.7 | 19 | 24.3 | 22.8 | 17.009 | 21.293 | 0.445 |
| Y013 | PMOD | 26.9 | 23.6 | 24 | 25.7 | 29.1 | 35.1 | 21.6 | 20.7 | 28 | 27.6 | 164.088 | 26.826 | 1.98 |
| Y015 | PMOD | 30 | 24.8 | 27.1 | 17.3 | 34.5 | 35.9 | 16.4 | 12.5 | 19.3 | 17.8 | 134.459 | 26.675 | 0.947 |
| Y018 | PMOD | 30.4 | 32.4 | 29.1 | 29.1 | 41 | 38.1 | 22.9 | 18.1 | 25.2 | 22.5 | 562.344 | 82.958 | 1.704 |
| Y019 | PMOD | 41 | 40 | 34.7 | 33.1 | 30.6 | 37 | 28.3 | 17.6 | 22.9 | 24.2 | 118.836 | 36.537 | 0.968 |
| Y021 | PMOD | 26.9 | 29.8 | 29.1 | 30.7 | 40 | 41 | 21.2 | 20.6 | 27.4 | 24.6 | 153.722 | 71.789 | 1.664 |
| Y026 | PMOD | 25.7 | 28 | 25.8 | 17.9 | 28.5 | 38.9 | 13 | 16.8 | 21.2 | 20.3 | 61.975 | 32.307 | 0.558 |
| Y027 | PMOD | 28.4 | 27.4 | 28.3 | 23.1 | 36.8 | 38 | 19.3 | 14.9 | 20.1 | 20.6 | 374.714 | 72.347 | 2.14 |
| Y028 | PMOD | 37.1 | 26.5 | 29.5 | 21.7 | 37 | 36.1 | 19.9 | 15.1 | 19.5 | 20 | 23.559 | 8.989 | 0.404 |
| Y030 | PMOD | 32.2 | 33.6 | 28.8 | 29.9 | 31.1 | 36.5 | 26.2 | 16.3 | 23.7 | 25.2 | 116.162 | 73.346 | 0.728 |
| Y032 | PMOD | 23.2 | 23.9 | 22.7 | 22 | 29.4 | 38.1 | 16.1 | 16.5 | 20 | 18.3 | 105.25 | 31.193 | 1.031 |
| Y033 | PMOD | 41 | 41 | 31.3 | 27.2 | 41 | 41 | 23.4 | 21.1 | 26.7 | 27.4 | 43.05 | 10.701 | 0.755 |
| Y036 | PMOD | 29.3 | 29.5 | 31.5 | 19.4 | 41 | 37.5 | 18.5 | 15.4 | 19.7 | 21.4 | 160.737 | 68.689 | 1.088 |
| Y037 | PMOD | 34.5 | 30 | 32.5 | 28 | 29.1 | 35.8 | 23.2 | 21.7 | 27.5 | 29.3 | 213.327 | 66.86 | 1.008 |
| Y038 | PMOD | 27.6 | 28.3 | 27.3 | 24.4 | 36.3 | 35.8 | 23.1 | 17.4 | 23.3 | 22.6 | 209.125 | 35.474 | 1.042 |
| Y039 | PMOD | 25.1 | 25.3 | 26.2 | 23.2 | 27.2 | 35.7 | 18.9 | 17.3 | 20.6 | 20.6 | 50.354 | 78.388 | 0.552 |
| Y042 | PMOD | 25.6 | 28 | 25.7 | 26.7 | 41 | 38 | 24.8 | 18.6 | 24.3 | 24 | 227.39 | 13.042 | 0.987 |
| Y047 | PMOD | 26.8 | 28.4 | 26.7 | 21.6 | 41 | 36.6 | 19.7 | 16.6 | 22.2 | 21.7 | 113.728 | 71.757 | 0.883 |
| Y050 | PMOD | 26.8 | 25.3 | 27.3 | 21.6 | 27.7 | 28 | 17.9 | 14.3 | 19.1 | 19 | 80.48 | 7.075 | 1.67 |
| Y052 | PMOD | 38 | 37 | 28 | 31.6 | 31.6 | 34.7 | 25.5 | 23.9 | 29.3 | 33.7 | 20.814 | 8.556 | 0.619 |
| Y056 | PMOD | 26.1 | 25.2 | 27.1 | 20.6 | 23.1 | 28.2 | 16.1 | 15.9 | 19.3 | 20.9 | 81.72 | 34.904 | 0.863 |
| Y057 | PMOD | 23.8 | 23.4 | 21.4 | 21.8 | 26.3 | 28.6 | 19.3 | 16.9 | 20.9 | 22.8 | 89.879 | 47.192 | 0.602 |
| Y059 | PMOD | 26 | 29.4 | 29.2 | 26.4 | 41 | 37.2 | 19.6 | 18.3 | 23.2 | 23.1 | 314.102 | 107.002 | 1.365 |
| Y060 | PMOD | 32.7 | 31.3 | 30.2 | 27.8 | 40 | 41 | 26.8 | 23.3 | 34.6 | 26.9 | 127.65 | 37.269 | 0.882 |
| Y061 | PMOD | 37.4 | 30 | 35 | 28.9 | 40 | 41 | 21.7 | 17.4 | 27.1 | 22.8 | 79.838 | 27.189 | 1.375 |
| Y065 | PMOD | 28.1 | 29 | 26.2 | 19.5 | 27.2 | 33.6 | 16.7 | 12.8 | 17.9 | 19 | 66.628 | 12.24 | 0.857 |
| Y066 | PMOD | 30 | 24.7 | 29.9 | 18.7 | 30.6 | 40 | 13.5 | 14.9 | 21.6 | 22.9 | 1048.72 | 14.516 | 1.198 |
| Y071 | PMOD | 25.5 | 26 | 28 | 24.1 | 28.5 | 41 | 20.5 | 19.8 | 24 | 24.3 | 38.38 | 21.582 | 0.655 |
| Y072 | PMOD | 32.6 | 36.5 | 32 | 24.3 | 28.6 | 41 | 19.4 | 22 | 28.4 | 26 | 111.581 | 44.697 | 1.17 |
| Y074 | PMOD | 23 | 23.8 | 24.7 | 21.2 | 26.3 | 39.3 | 17.1 | 15.1 | 19.4 | 20.2 | 58.189 | 48.375 | 1.151 |
| Y075 | PMOD | 29.6 | 30.9 | 30.7 | 28.6 | 41 | 34.9 | 25.3 | 23.4 | 34.4 | 32.7 | 109.236 | 57.971 | 0.957 |
| Y076 | PMOD | 27 | 27.3 | 27.3 | 22.9 | 41 | 36.6 | 21.7 | 17.1 | 25.2 | 24.1 | 135.693 | 27.746 | 1.027 |
| Y085 | PMOD | 30.6 | 30.3 | 29.2 | 30.7 | 41 | 40 | 26.2 | 28.5 | 34.7 | 36.2 | 103.193 | 31.957 | 0.425 |
| Y086 | PMOD | 26.8 | 25.2 | 28.2 | 21.1 | 33.5 | 36.8 | 19.6 | 19 | 23.1 | 22.9 | 41.171 | 50.703 | 1.035 |
| Y087 | PMOD | 23.6 | 22.6 | 23.2 | 26.3 | 26.8 | 28.9 | 21.8 | 20.9 | 24 | 23.8 | 134.624 | 42.84 | 0.679 |
| Y097 | PMOD | 28.4 | 28.7 | 30.1 | 23.2 | 31.1 | 41 | 25.7 | 20.1 | 25.7 | 26.8 | 118.901 | 34.638 | 0.867 |
| Y107 | PMOD | 25.8 | 24.7 | 25 | 23.9 | 26.5 | 37 | 19.1 | 18.2 | 27.2 | 28.4 | 152.979 | 26.353 | 0.345 |
| Y118 | PMOD | 36.8 | 26.8 | 32.5 | 22.1 | 28.7 | 29.9 | 23.1 | 17.1 | 24.1 | 23.6 | 180.572 | 1.606 | 0.469 |
| Y120 | PMOD | 24.9 | 26 | 25.6 | 23.3 | 26.5 | 27.6 | 18.2 | 15.5 | 19.9 | 21.3 | 16.151 | 16.544 | 0.278 |
| Y127 | PMOD | 23.1 | 25.6 | 26.1 | 21.1 | 25.4 | 27.2 | 15.4 | 14.7 | 19.9 | 20.2 | 191.429 | 14.727 | 1.247 |
| Y142 | PMOD | 36 | 34.8 | 28.7 | 32.2 | 33.7 | 36.4 | 32.9 | 24.2 | 24.9 | 31 | 408.682 | 50.74 | 2.093 |
| Y143 | PMOD | 28.8 | 25.5 | 26.5 | 18.6 | 38.8 | 34.6 | 17.7 | 13.1 | 16.8 | 18.2 | 184.632 | 21.303 | 0.652 |
| Y144 | PMOD | 28.7 | 32.3 | 29.8 | 26.1 | 35.9 | 41 | 22.9 | 22.8 | 29.1 | 30.4 | 63.528 | 76.445 | 0.954 |
| Y147 | PMOD | 22.4 | 22.1 | 23.9 | 20.5 | 25.1 | 27 | 19.3 | 15.9 | 20.4 | 21.3 | 80.7 | 23.707 | 0.907 |
| Y148 | PMOD | 28.5 | 26.7 | 28.3 | 19.4 | 28.5 | 37.1 | 14.9 | 12 | 15.4 | 17.3 | 171.311 | 36.133 | 1.117 |
| Y157 | PMOD | 21.2 | 20.7 | 21.6 | 22.6 | 23.6 | 25 | 20.6 | 18.3 | 24.4 | 22.7 | 44.001 | 25.751 | 0.651 |
| Y174 | PMOD | 35 | 28.4 | 32 | 26.4 | 41 | 41 | 23.5 | 21.4 | 28.2 | 28.3 | 85.748 | 58.395 | 1.091 |
| Y237 | PMOD | 26.3 | 25.4 | 26.7 | 19.3 | 27.9 | 35.8 | 15 | 11.5 | 18.5 | 19.3 | 0 | 8.36 | 1.349 |
| Y249 | PMOD | 26.8 | 33.8 | 29.5 | 21.6 | 40 | 30.1 | 18.5 | 16.6 | 23.1 | 20.6 | 56.408 | 103.364 | 0.69 |
| Y252 | PMOD | 27.6 | 26.3 | 25.7 | 21.2 | 29.4 | 37.3 | 18.3 | 16.3 | 21.8 | 23 | 185.899 | 17.747 | 0.775 |
| Y266 | PMOD | 28.7 | 27.6 | 29.8 | 29.6 | 36.6 | 37.6 | 22.7 | 20.3 | 26.7 | 26.4 | 39.742 | 7.977 | 1.438 |
| Y279 | PMOD | 28.8 | 30.6 | 30.5 | 21.3 | 41 | 36.4 | 16.2 | 14.7 | 19.2 | 20.2 | 196.233 | 37.022 | 0.719 |
| Y458 | PMOD | 27.9 | 28.2 | 27 | 21.8 | 36.6 | 37.1 | 19.3 | 18.7 | 21.6 | 22.4 | 111.444 | 49.822 | 0.537 |
| Y460 | PMOD | 30.3 | 31.5 | 29.3 | 27.9 | 41 | 35.1 | 27.1 | 23.5 | 29.1 | 28.9 | 163.896 | 145.833 | 1.26 |
| Y462 | PMOD | 23.8 | 23.7 | 28.3 | 25.3 | 29.1 | 34.9 | 19.6 | 18.5 | 22.1 | 22.1 | 94.007 | 36.233 | 0.689 |
| Y471 | PMOD | 37.1 | 33.5 | 31.5 | 30 | 32.2 | 37 | 22.9 | 22 | 29.4 | 28 | 118.151 | 32.125 | 1.896 |
| Y513 | PMOD | 25.1 | 23.8 | 27.2 | 22.3 | 26.7 | 28.4 | 18.9 | 20.2 | 25 | 26.8 | 8.323 | 17.79 | 0.396 |
| Y541 | PMOD | 25.1 | 23.1 | 24.9 | 21.2 | 27.5 | 28.4 | 19.6 | 16 | 19.4 | 19.8 | 139.84 | 23.452 | 1.121 |
